# Supplementary material
Source: PubMed Central journal article supplement (PMC3538492)
Supplement: mmc1.pdf [file mmc1.pdf]

## Supplemental eTable

| Assay                          | Reagent          | Sequence                                                                            |
|--------------------------------|------------------|-------------------------------------------------------------------------------------|
| FGFR3<br>Primary PCR           | Exon 7 Forward   | 5' GCG GTC CCA AAA GGG TCA GTA CAG TGG CGG TGG TGG TGA GGG AG 3'                    |
|                                | Exon 7 Reverse   | 5' GCG GTC CCA AAA GGG TCA GTA CGC ACC GCC GTC TGG TTG G 3'                         |
|                                | Exon 10 Forward  | 5' GCG GTC CCA AAA GGG TCA GTA CGG TCT GGC CCT CTA GAC TCA 3'                       |
|                                | Exon 10 Reverse  | 5' GCG GTC CCA AAA GGG TCA GTA CGA AGA AGC CCA CCC CGT A 3'                         |
|                                | Exon 15 Forward  | 5' GCG GTC CCA AAA GGG TCA GTA CCC TGC CCT GAG ATG CT 3'                            |
|                                | Exon 15 Reverse  | 5' GCG GTC CCA AAA GGG TCA GTA CCG TCC TAC TGG CAT GAC C 3'                         |
| FGFR3<br>Mutation<br>Detection | Exon 7 Forward   | 5' GCG TCA TCT GCC CCC A 3'                                                         |
|                                | Exon 7 Reverse   | 5' CAC CGC CGT CTG GTT G 3'                                                         |
|                                | Exon 7 LNA       | 5' AGA <u>GCG</u> <u>CTC</u> <u>CCC</u> G 3' (LNA bases are underlined)             |
|                                | Exon 7 Probe     | 5' FAM-CCC GCC TGC AGG ATG GGC CGG T-Iowa Black FQ 3'                               |
|                                | Exon 10 Forward  | 5' GGC CTC AAC GCC CAT GT 3'                                                        |
|                                | Exon 10A Reverse | 5' TAG CTG AGG ATG CCT GCA TA 3'                                                    |
|                                | Exon 10B Reverse | 5' CCG TAG CTG AGG ATG CCT G 3'                                                     |
|                                | Exon 10A LNA     | 5' ATA <u>CAC</u> <u>ACT</u> <u>GCC</u> <u>CGC</u> CT 3' (LNA bases are underlined) |
|                                | Exon 10B LNA     | 5' GCC TGC <u>ATA</u> <u>CAC</u> <u>ACT</u> 3' (LNA bases are underlined)           |
|                                | Exon 10 Probe    | 5' FAM-CCG AGG AGG AGC TGG TGG AGG CTG AC-Iowa Black FQ 3'                          |
|                                | Exon 15 Forward  | 5' CAA TGT GCT GGT GAC CGA G 3'                                                     |
|                                | Exon 15 Reverse  | 5' CCG GGC TCA CGT TGG TC 3'                                                        |
|                                | Exon 15 LNA      | 5' GGT CGT <u>CTT</u> <u>CTT</u> <u>GTA</u> <u>GT</u> 3' (LNA bases are underlined) |
|                                | Exon 15 Probe    | 5' FAM-CTG GCC CGG GAC GTG CAC AAC CTC GAC T-Iowa Black FQ 3'                       |
| Twist/Nid                      | Twist Forward    | 5' GTT AGG GTT CGG GGG CGT TGT T 3'                                                 |
|                                | Twist Reverse    | 5' CCG TCG CCT TCC TCC GAC GAA 3'                                                   |
|                                | Nid Forward      | 5' GCG GTT TTT AAG GAG TTT TAT TTT C 3'                                             |
|                                | Nid Reverse      | 5' CTA CGA AAT TCC CTT TAC GCT 3'                                                   |
| ACTB                           | ACTB Forward     | 5' TAG GGA GTA TAT AGG TTG GGG AAG TT 3'                                            |
|                                | ACTB Reverse     | 5' AAC ACA CAA TAA CAA ACA CAA ATT CAC 3'                                           |
|                                | ACTB Zen Probe   | 5' TGG GGT GGT/ZEN/GAT GGA GGA GGT TTA GTA AGT TTT TT 3'                            |
